# Supplementary material for: Ni2FeS4as a highly efficient earth-abundant co-catalyst in photocatalytic hydrogen evolution
Source: Royal Society of Chemistry journal article supplement (doi:10.1039/d3ta02439c), 2023-01-01
Supplement: d3ta02439c1.pdf [file d3ta02439c1.pdf]

## Ni<sub>2</sub>FeS<sub>4</sub> as highly efficient earth-abundant co-catalyst in photocatalytic hydrogen evolution

### Supplementary Information

J. Zander, R. Marschall

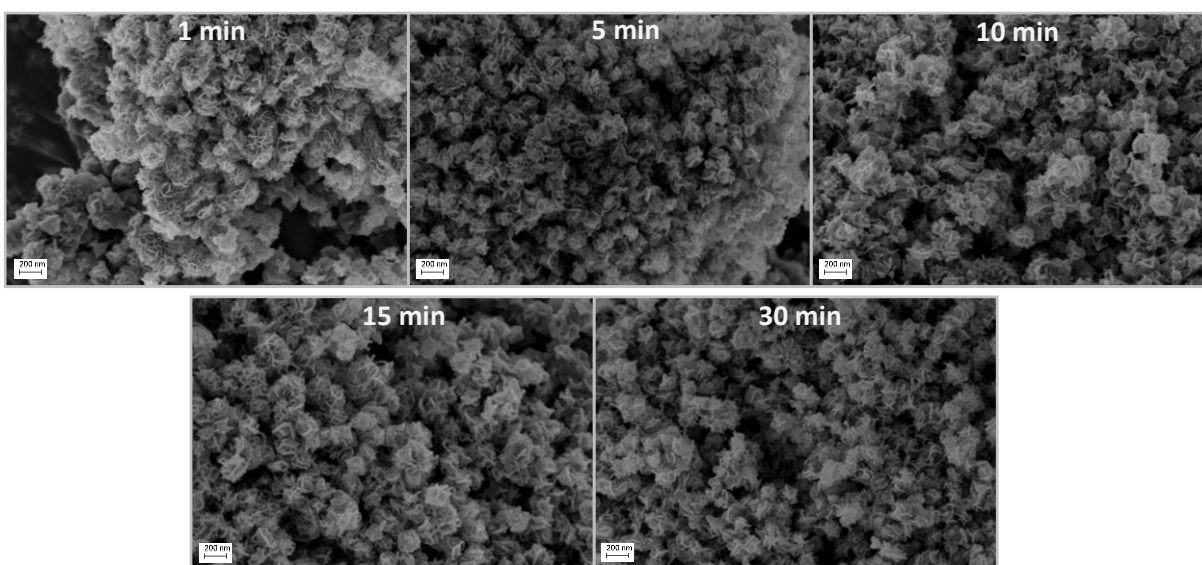

**Figure S1** SEM images of Ni<sub>2</sub>FeS<sub>4</sub> obtained after different synthesis durations.

**Table S1** Element composition as determined *via* EDX (green) and XPS (blue). Values are average for several point areas for EDX.

| EDX; XPS                                       | 1 min                  | 5 min        | 10 min        | 15 min                | 30 min                |
|------------------------------------------------|------------------------|--------------|---------------|-----------------------|-----------------------|
| At.% O                                         | 41.73 ± 5.42<br>40.69  | 21.00 ± 2.11 | 35.25 ± 5.59  | 34.53 ± 0.51<br>35.54 | 32.05 ± 2.21<br>38.40 |
| At.% Ni                                        | 14.80 ± 2.51<br>7.10   | 5.80 ± 1.57  | 12.10 ± 5.80  | 17.08 ± 0.05<br>5.92  | 16.83 ± 0.46<br>7.15  |
| At.% Fe                                        | 7.50 ± 1.85<br>2.99    | 2.63 ± 0.72  | 6.05 ± 3.18   | 8.83 ± 0.17<br>3.0    | 8.70 ± 0.52<br>3.83   |
| At.% S                                         | 27.27 ± 10.89<br>17.80 | 12.20 ± 8.00 | 20.15 ± 10.11 | 29.65 ± 0.21<br>18.16 | 30.53 ± 1.35<br>24.70 |
| At.% C                                         | 16.30 ± 7.62<br>31.41  | 61.90 ± 6.42 | 26.40 ± 24.75 | 9.88 ± 0.38<br>37.37  | 11.78 ± 0.26<br>25.92 |
| Ni:Fe                                          | 2.04 ± 0.49<br>2.37    | 2.21 ± 0.16  | 2.03 ± 0.11   | 1.92 ± 0.03<br>1.97   | 1.94 ± 0.10<br>1.87   |
| M:S                                            | 0.92 ± 0.39<br>0.567   | 0.81 ± 0.29  | 0.90 ± 0.01   | 0.87 ± 0.002<br>0.491 | 0.84 ± 0.02<br>0.444  |
| SO <sub>4</sub> <sup>2-</sup> /S <sup>2-</sup> | 1.07                   |              |               | 0.96                  | 1.13                  |

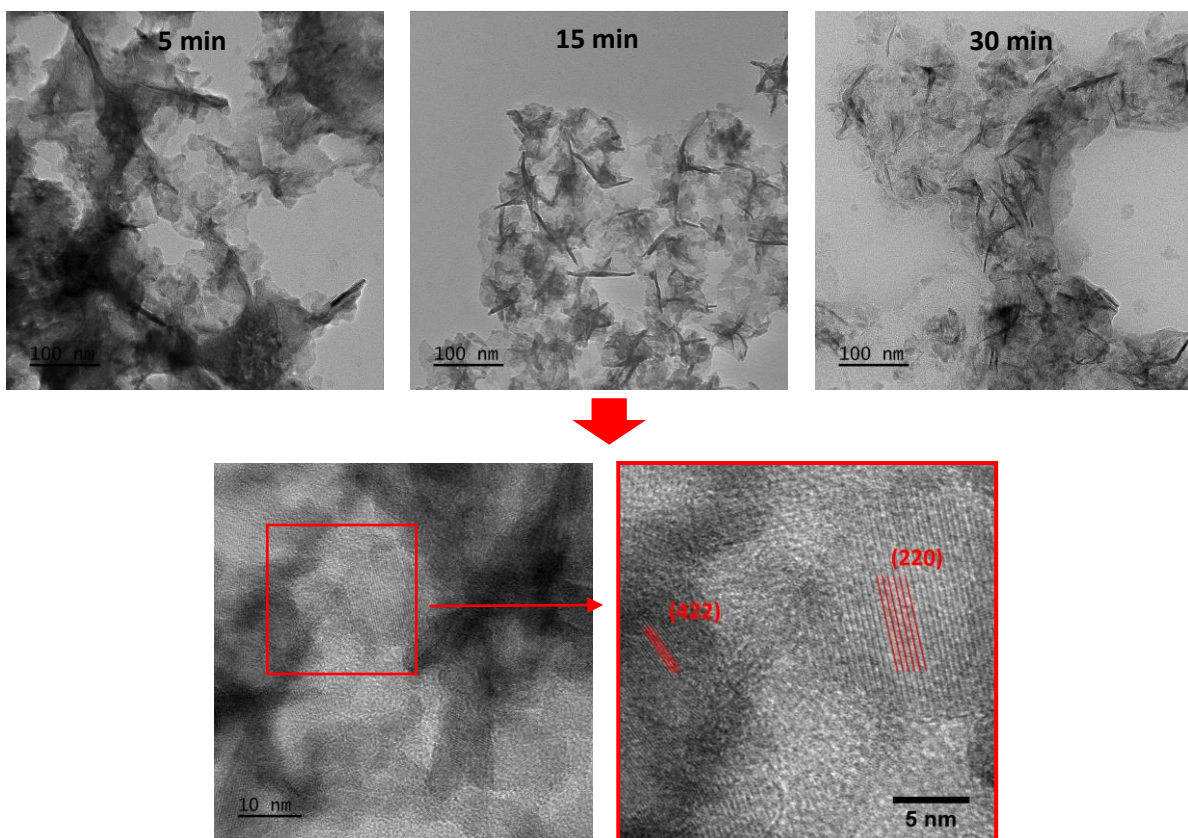

**Figure S2** TEM images of  $\text{Ni}_2\text{FeS}_4$  synthesised for different times in the microwave, including lattice planes corresponding to the  $(422)$  and  $(220)$  planes in the samples synthesised for 15 min.

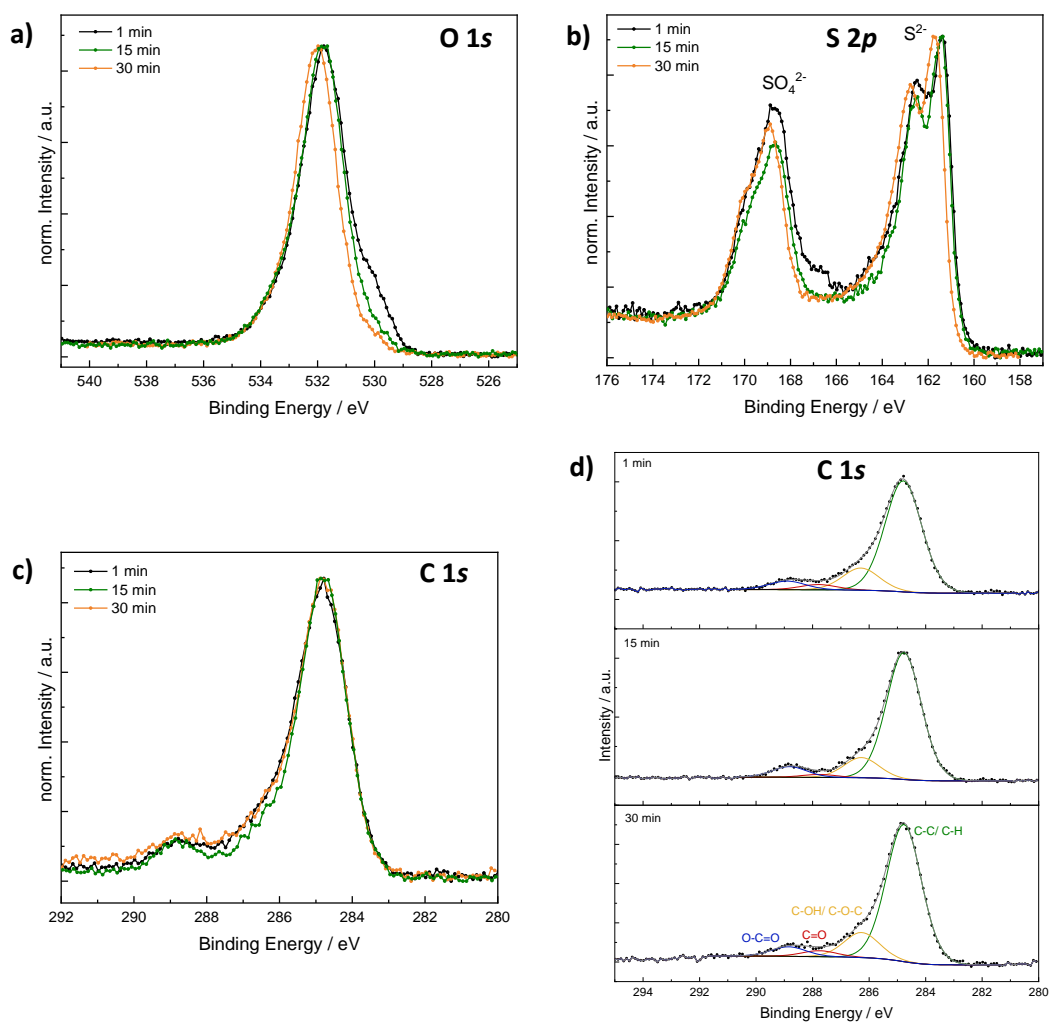

**Figure S3** Normalised O 1s spectra (a), S 2p spectra (b) and C 1s spectra (c), as well as fitted C 1s spectra (d) for  $\text{Ni}_2\text{FeS}_4$  synthesised for 1, 15 and 30 min.

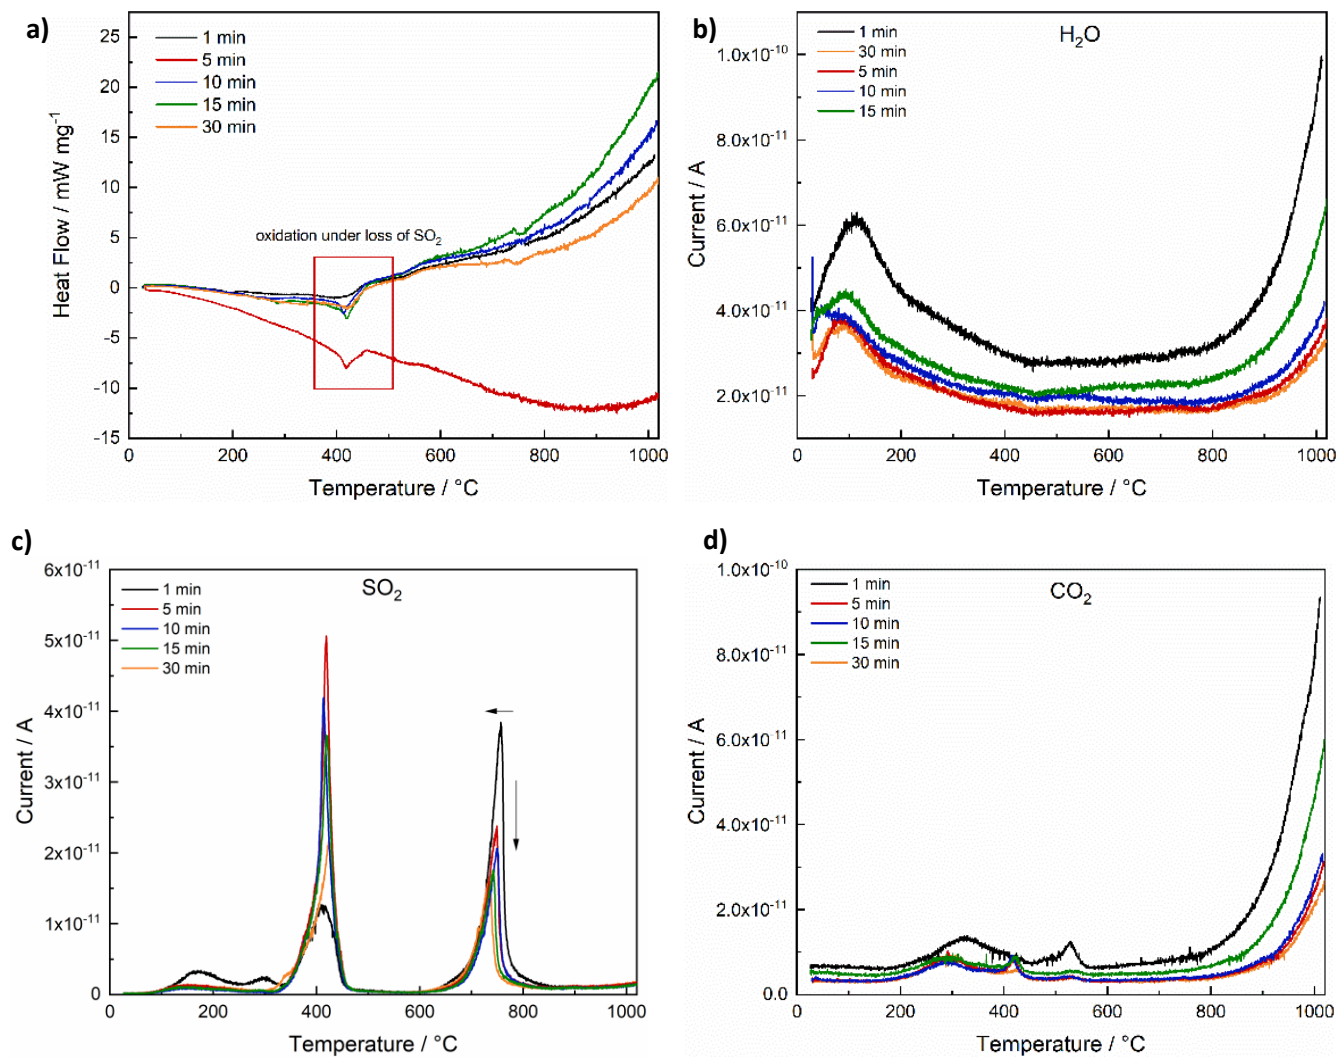

**Table S2**  $\text{SO}_2$  peak areas and relative ratios.

| Synthesis Time | Area $\text{SO}_2$ -1 [A/ $^{\circ}\text{C}/\text{mg}$ ] | Area $\text{SO}_2$ -2 [A/ $^{\circ}\text{C}/\text{mg}$ ] | Sum [A/ $^{\circ}\text{C}/\text{mg}$ ] | $\text{SO}_2$ -1/ $\text{SO}_2$ -2 |
|----------------|----------------------------------------------------------|----------------------------------------------------------|----------------------------------------|------------------------------------|
| 1 min          | $3.04 \cdot 10^{-10}$                                    | $6.00 \cdot 10^{-10}$                                    | $9.03 \cdot 10^{-10}$                  | 0.51                               |
| 5 min          | $5.77 \cdot 10^{-10}$                                    | $3.61 \cdot 10^{-10}$                                    | $9.38 \cdot 10^{-10}$                  | 1.60                               |
| 10 min         | $5.66 \cdot 10^{-10}$                                    | $3.74 \cdot 10^{-10}$                                    | $9.40 \cdot 10^{-10}$                  | 1.51                               |
| 15 min         | $7.99 \cdot 10^{-10}$                                    | $4.66 \cdot 10^{-10}$                                    | $1.26 \cdot 10^{-9}$                   | 1.71                               |
| 30 min         | $4.48 \cdot 10^{-10}$                                    | $3.33 \cdot 10^{-10}$                                    | $7.81 \cdot 10^{-10}$                  | 1.34                               |

**Figure S4** TG-MS measurements for  $\text{Ni}_2\text{FeS}_4$  with different synthesis durations. DSC curves during a heating with 2 K/min (a) and corresponding gas evolutions monitored with MS:  $\text{H}_2\text{O}$  evolution (b),  $\text{SO}_2$  evolution (c), and  $\text{CO}_2$  evolution (d).

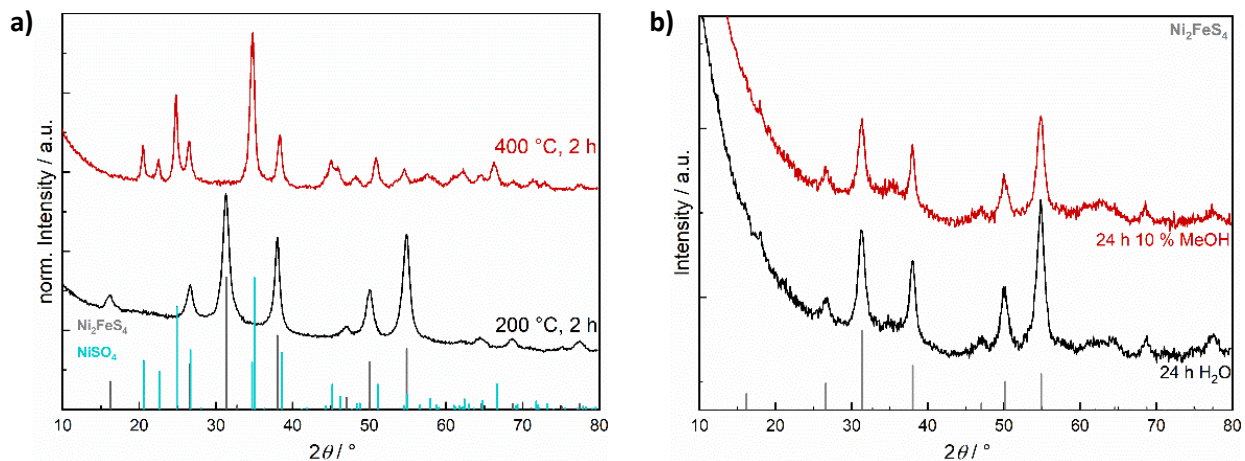

**Figure S5** XRD patterns after post-synthetic heat treatment of  $\text{Ni}_2\text{FeS}_4$  (30 min synthesis time) for 2 h at 200 and 400 °C (a) and after dispersion in  $\text{H}_2\text{O}$ / 10 vol.% aqueous methanol (b).

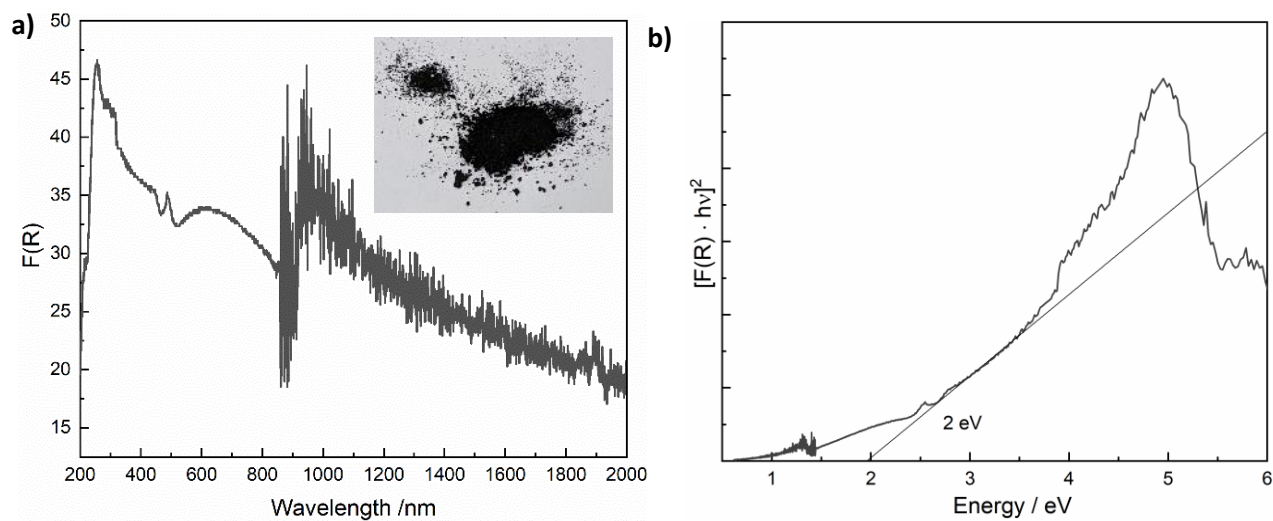

**Figure S6** Kubelka-Munk (a) and direct Tauc plot (b) for  $\text{Ni}_2\text{FeS}_4$  obtained after 30 min at 200 °C, elucidating the strong light absorption properties of the sulphide well into the NIR region.

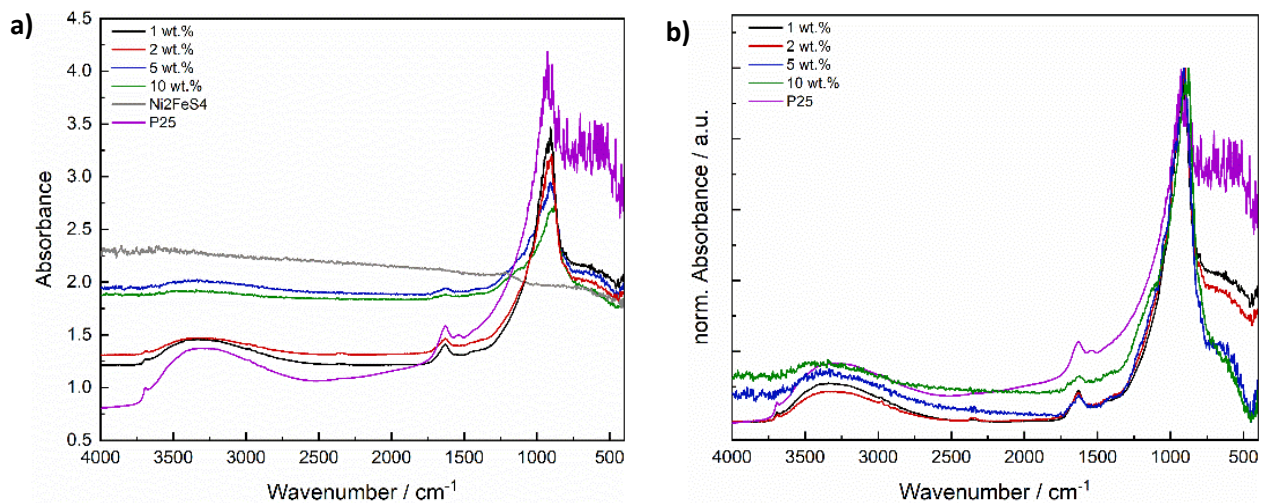

**Figure S7** DRIFT spectra for P25 after loading with different amounts of  $\text{Ni}_2\text{FeS}_4$  without normalisation (a) and normalised (b), to better show the offset caused by the absorption of  $\text{Ni}_2\text{FeS}_4$ .

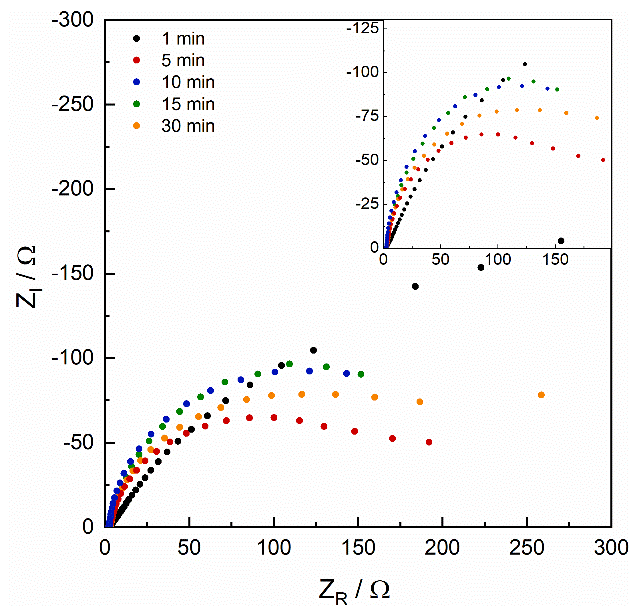

**Figure S8** Nyquist plots for  $\text{Ni}_2\text{FeS}_4$  obtained after different synthesis durations. The impedance measurements were conducted on carbon fibre electrodes in 1 M KOH at open circuit potential.

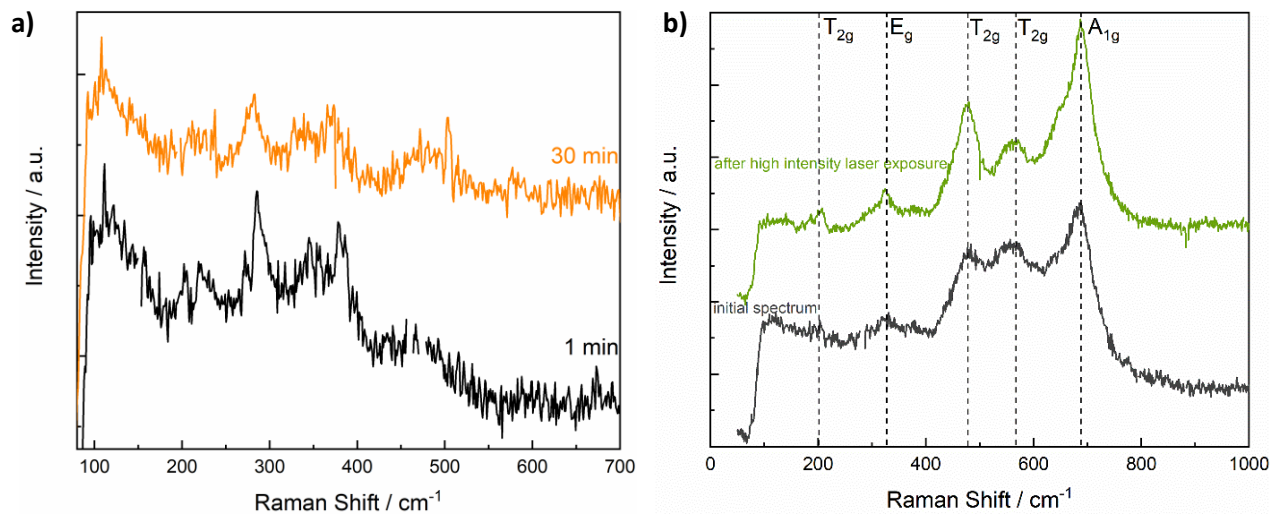

**Figure S9** Raman spectra for  $\text{Ni}_2\text{FeS}_4$  obtained after 1 and after 30 min at low laser intensity are shown in (a) and the transformation to a typical inverse spinel structure, most probably  $\text{NiFe}_2\text{O}_4$ , is shown in (b) first at lower laser power but already enough for oxidation (black) and then at a higher laser power (green).

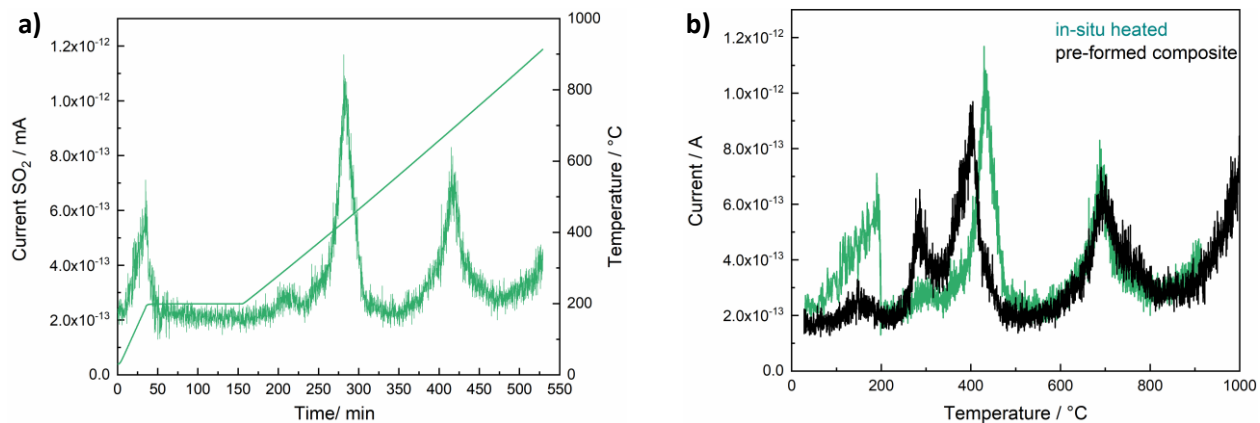

**Figure S10**  $\text{SO}_2$  gas evolution and temperature profile over time for  $\text{TiO}_2$  and  $\text{Ni}_2\text{FeS}_4$  ground together, but not annealed prior to the TG-MS measurement (a) and MS response for  $m/z=64$  ( $\text{SO}_2$ ) depending on the temperature for a pre-formed and an in-situ formed composite of  $\text{TiO}_2$  and 5 wt.% of  $\text{Ni}_2\text{FeS}_4$  (b).

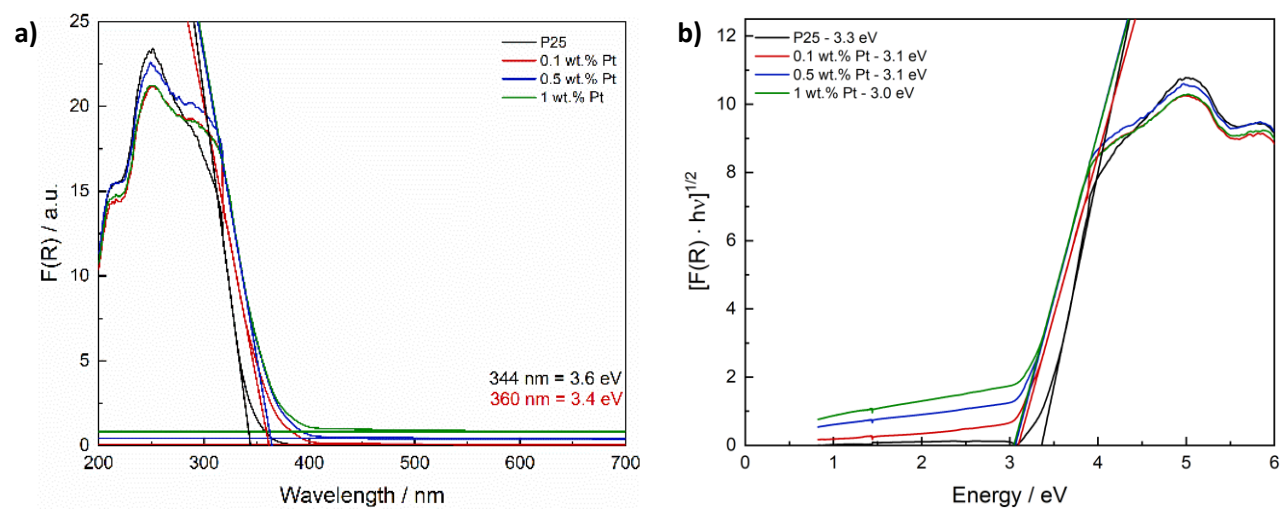

**Figure S11** Kubelka-Munk (a) and indirect Tauc plot (b) of P25 before and after photo-deposition of Pt.



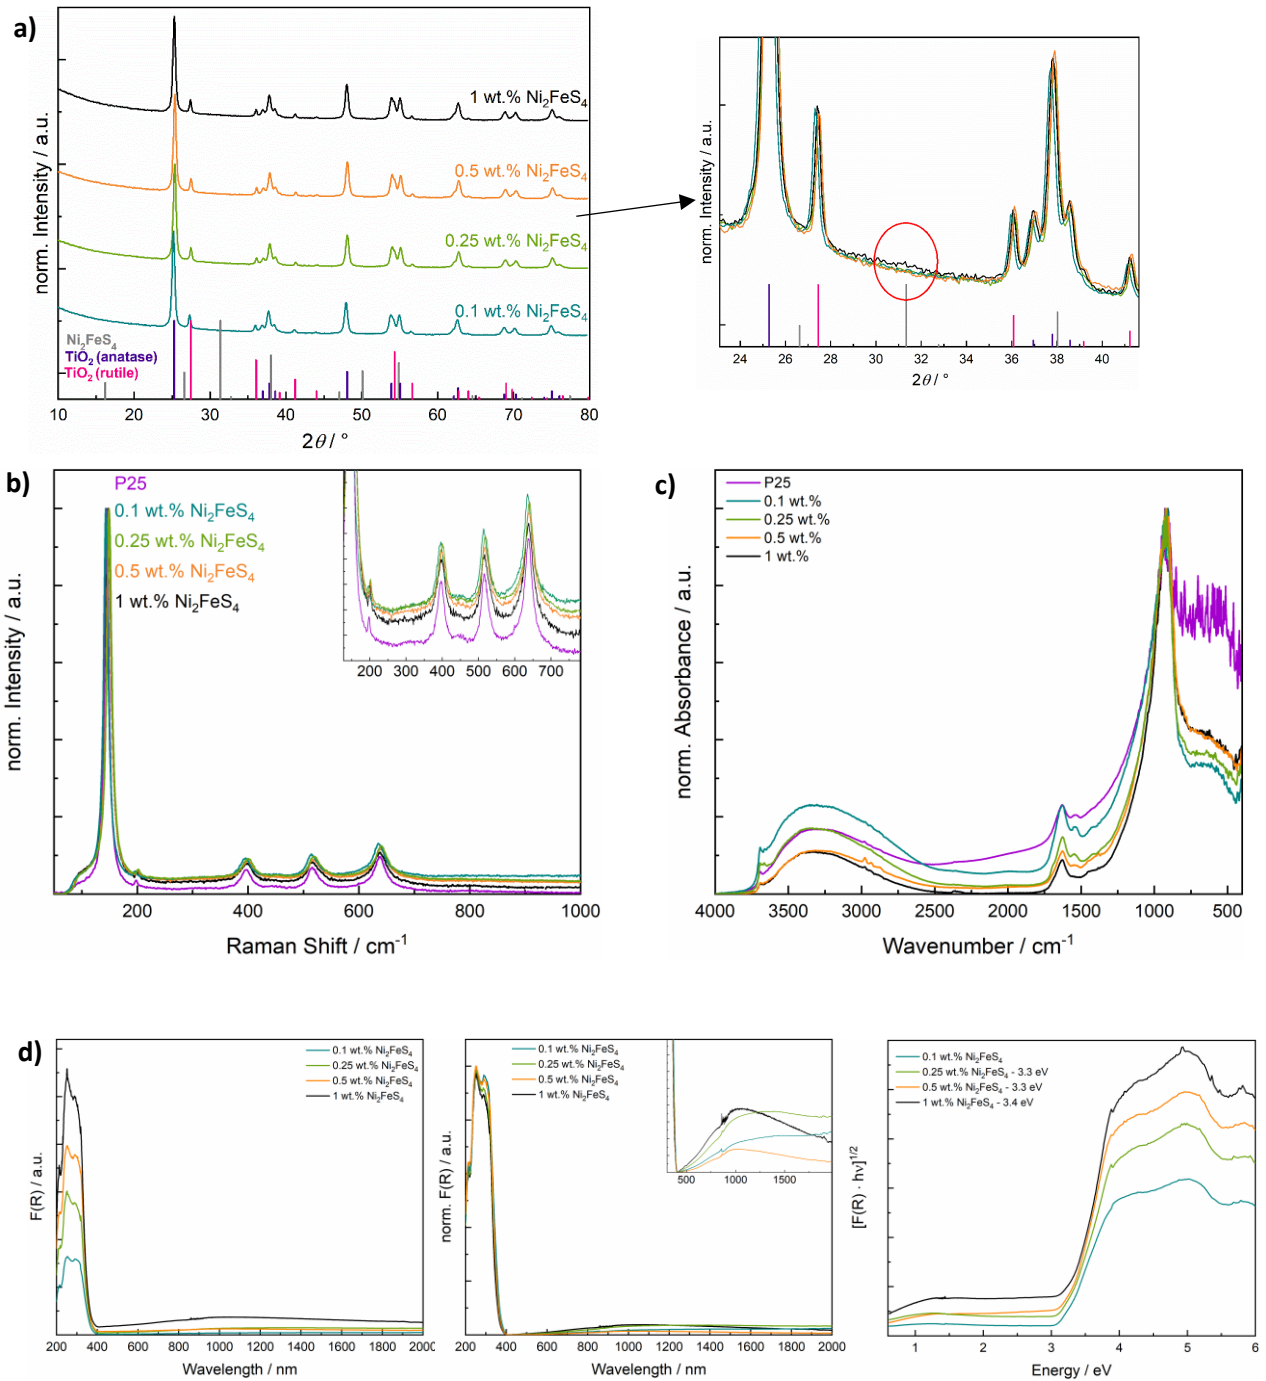

**Figure S12** Cu-XRD patterns for TiO<sub>2</sub> loaded with Ni<sub>2</sub>FeS<sub>4</sub> including 0.1 wt.% and 0.5 wt.% (a), corresponding Raman spectra (b), DRIFT spectra (c) and UV/vis/NIR spectra (d). At low loadings with Ni<sub>2</sub>FeS<sub>4</sub>, an increased pseudo-absorption in the UV region is additionally visible.

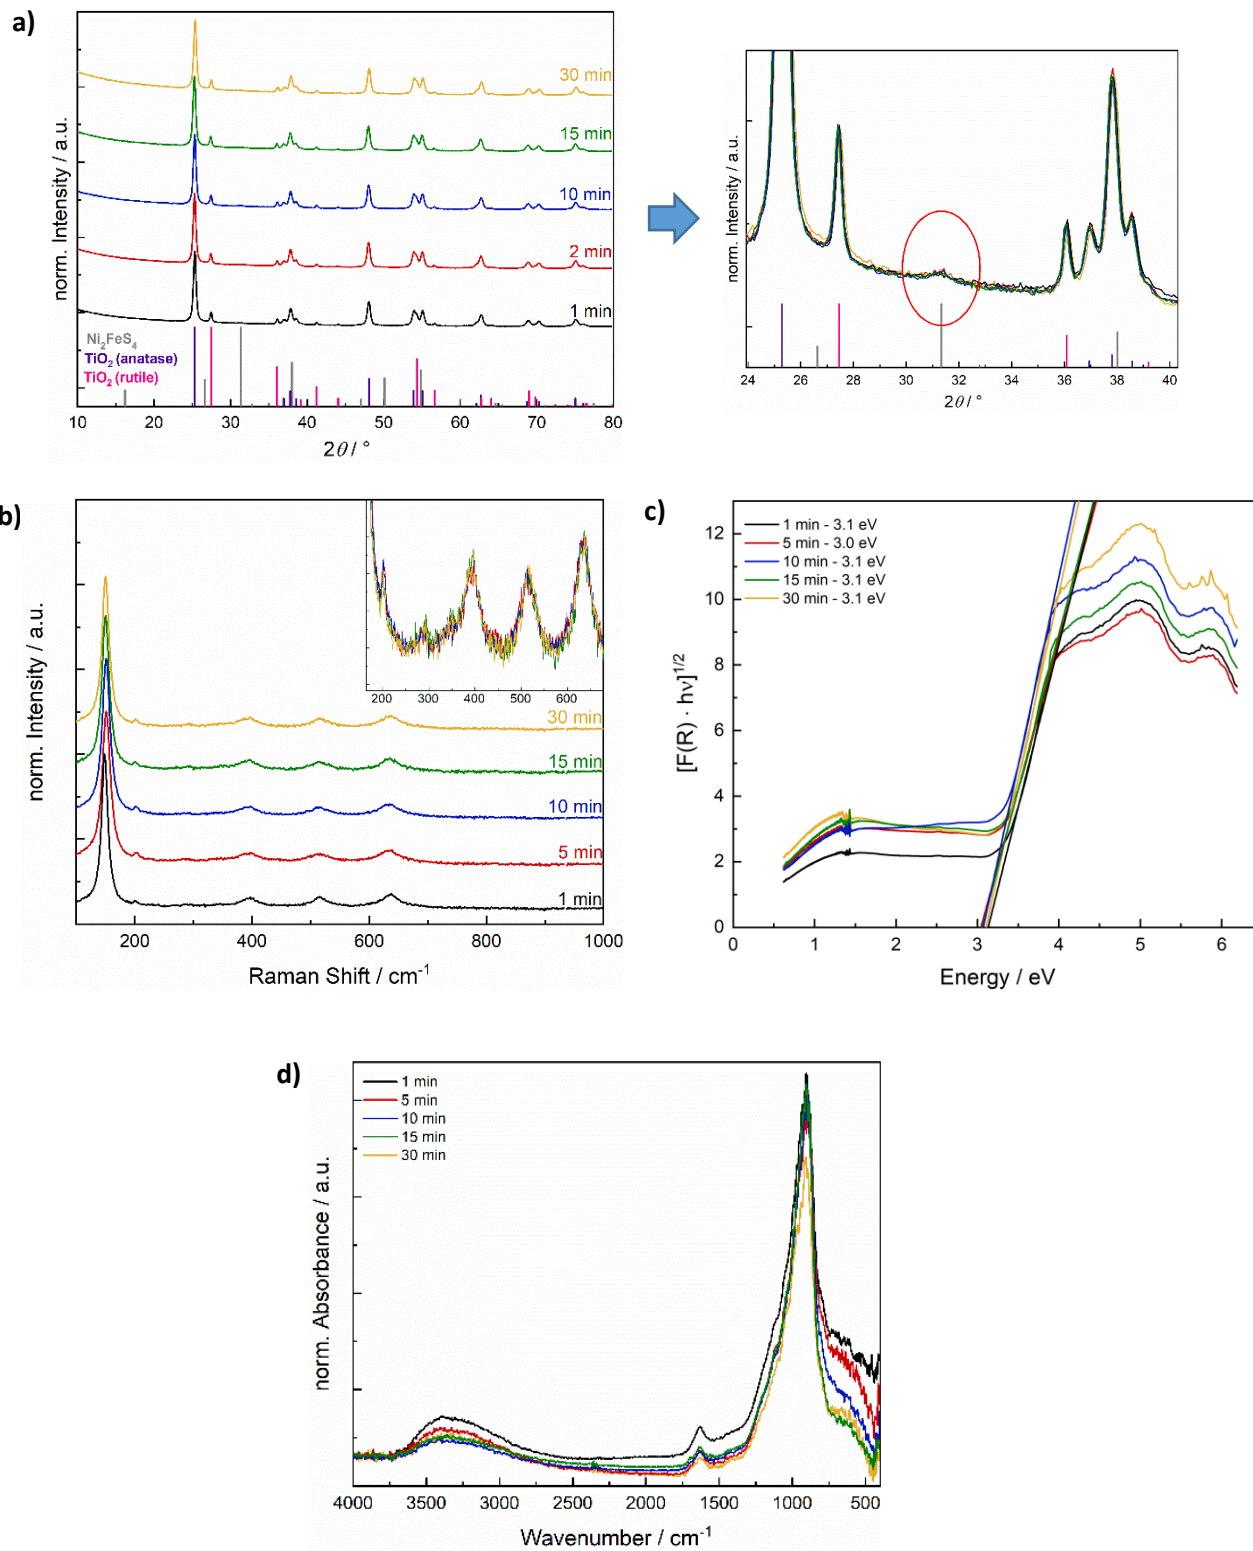

**Figure S13** XRD patterns of  $\text{Ni}_2\text{FeS}_4$  obtained after different synthesis times and loaded on  $\text{TiO}_2$  in 5 wt.% (a), corresponding Raman spectra (b), UV/vis/NIR spectra (c) and DRIFT spectra (d).

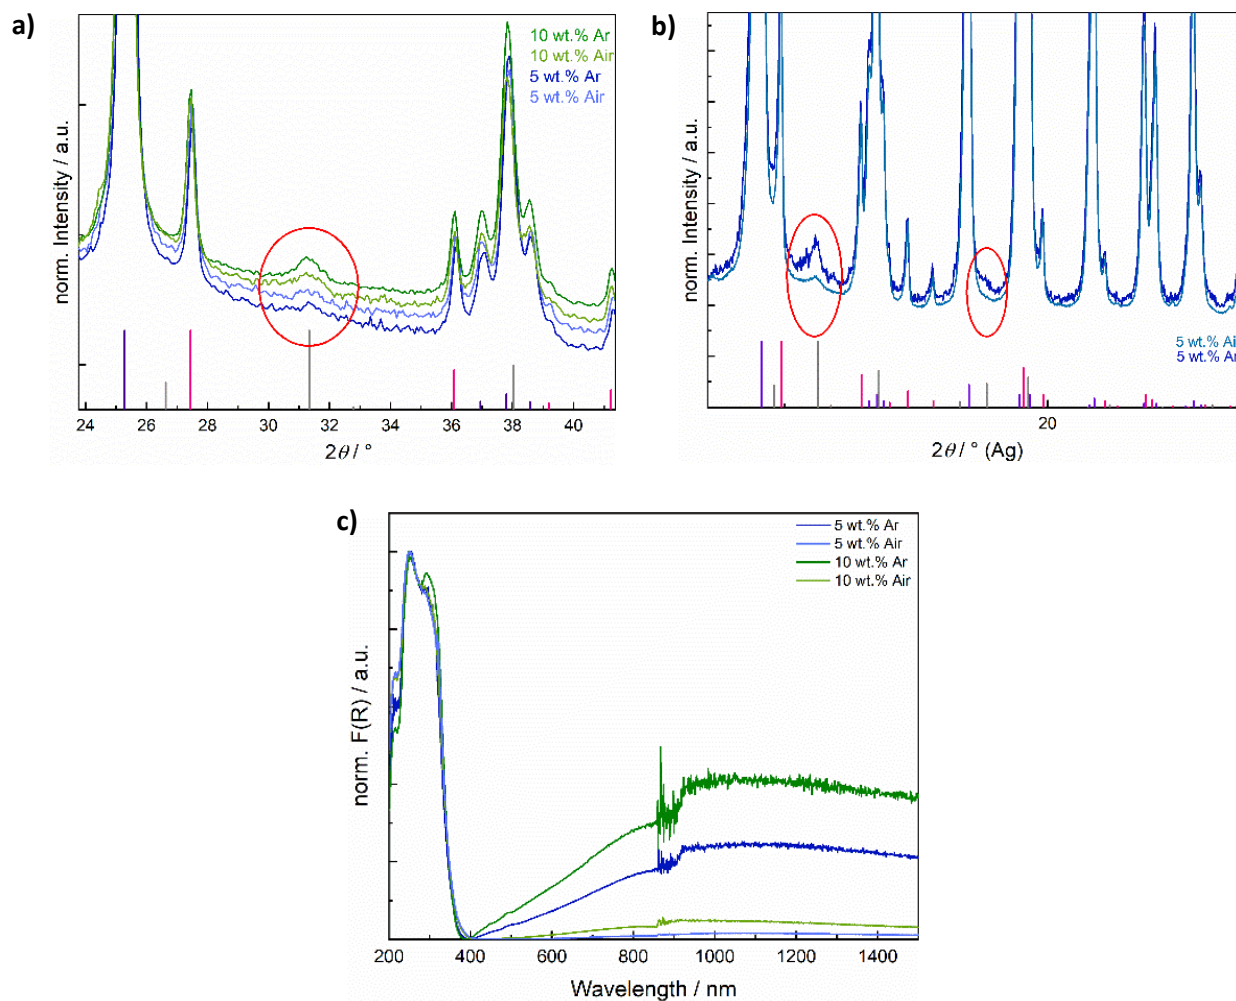

**Figure S14** Comparative XRD patterns for a loading of 5 and 10 wt.% at TiO<sub>2</sub> and calcination in Ar vs. in air – Cu radiation (a), Ag radiation (b) and corresponding UV/vis/NIR spectra (c).

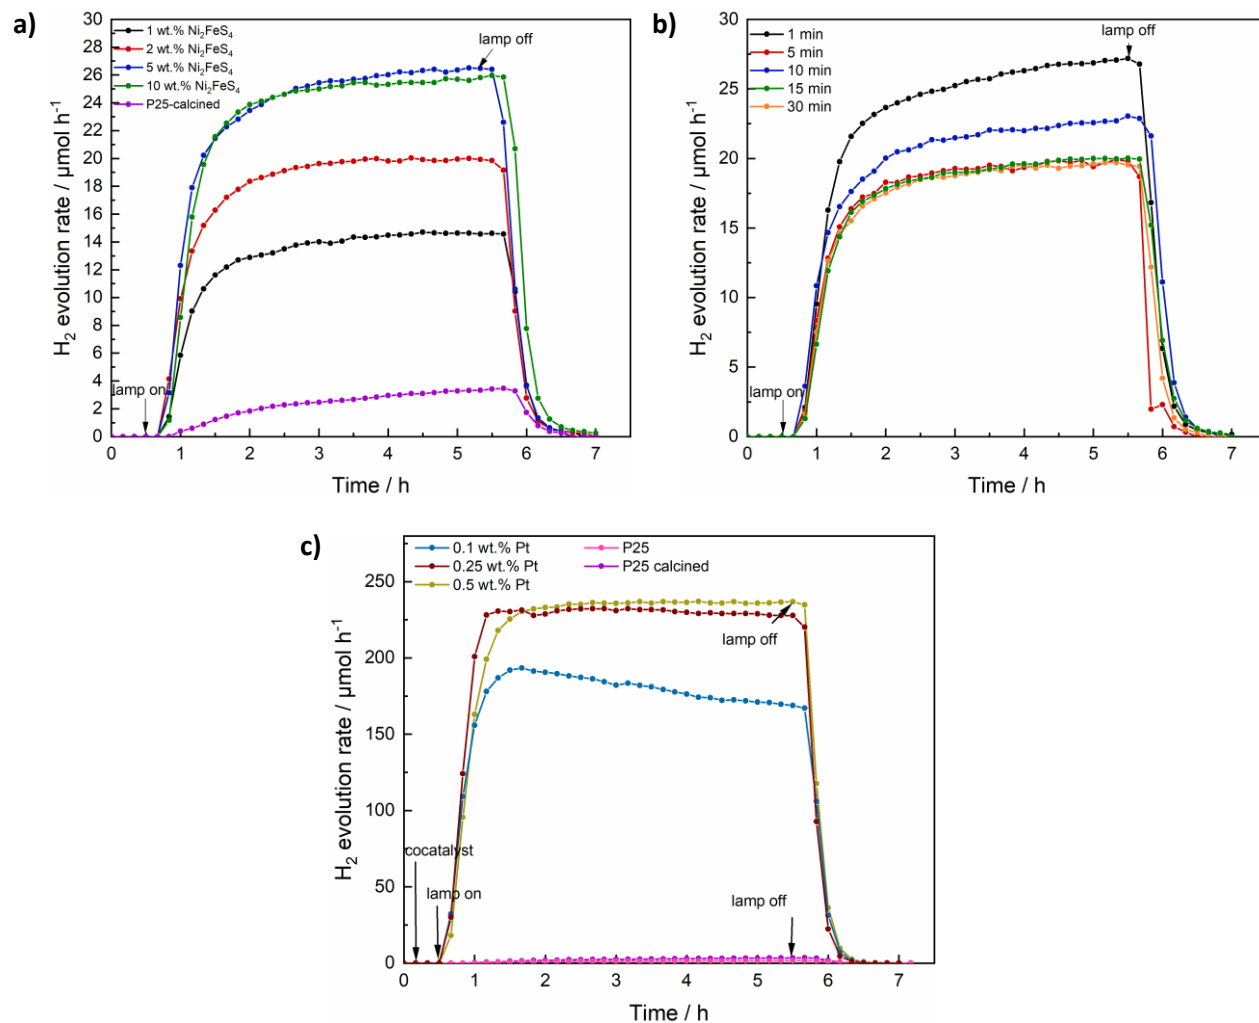

**Figure S15** Hydrogen evolution for Ni<sub>2</sub>FeS<sub>4</sub> on TiO<sub>2</sub> with different loadings and annealing in air (a) and for 5 wt.% of Ni<sub>2</sub>FeS<sub>4</sub> (annealed in air) synthesised for different durations (b). Comparative measurements using photodeposited Pt as cocatalyst (d).

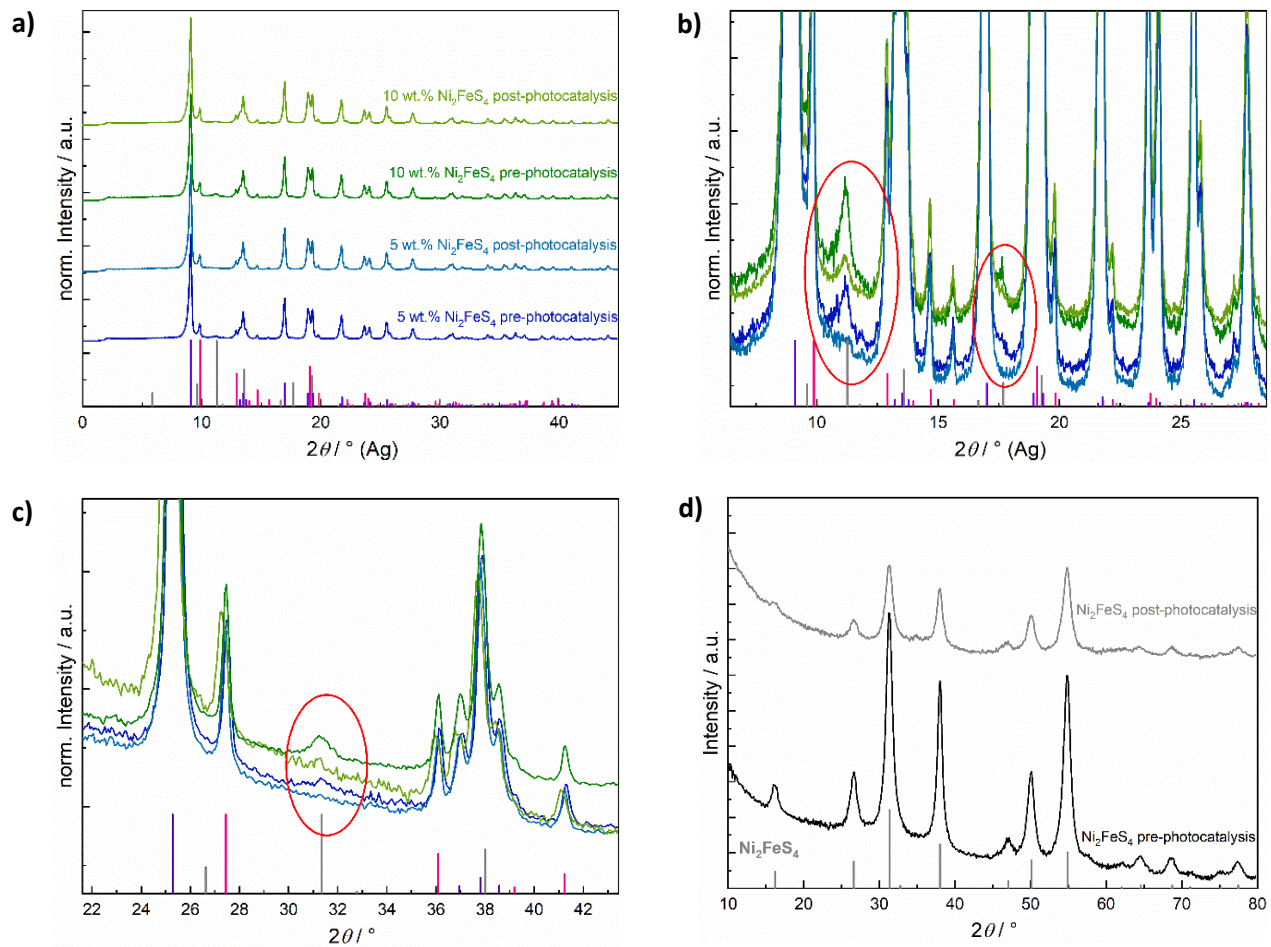

**Figure S16** Ag-XRD patterns for 5 and 10 wt.% loading at TiO<sub>2</sub> before and after photocatalysis (a and b), Cu-XRD patterns of the same samples (c) and of Ni<sub>2</sub>FeS<sub>4</sub> before and after photocatalysis with a Hg lamp (d).

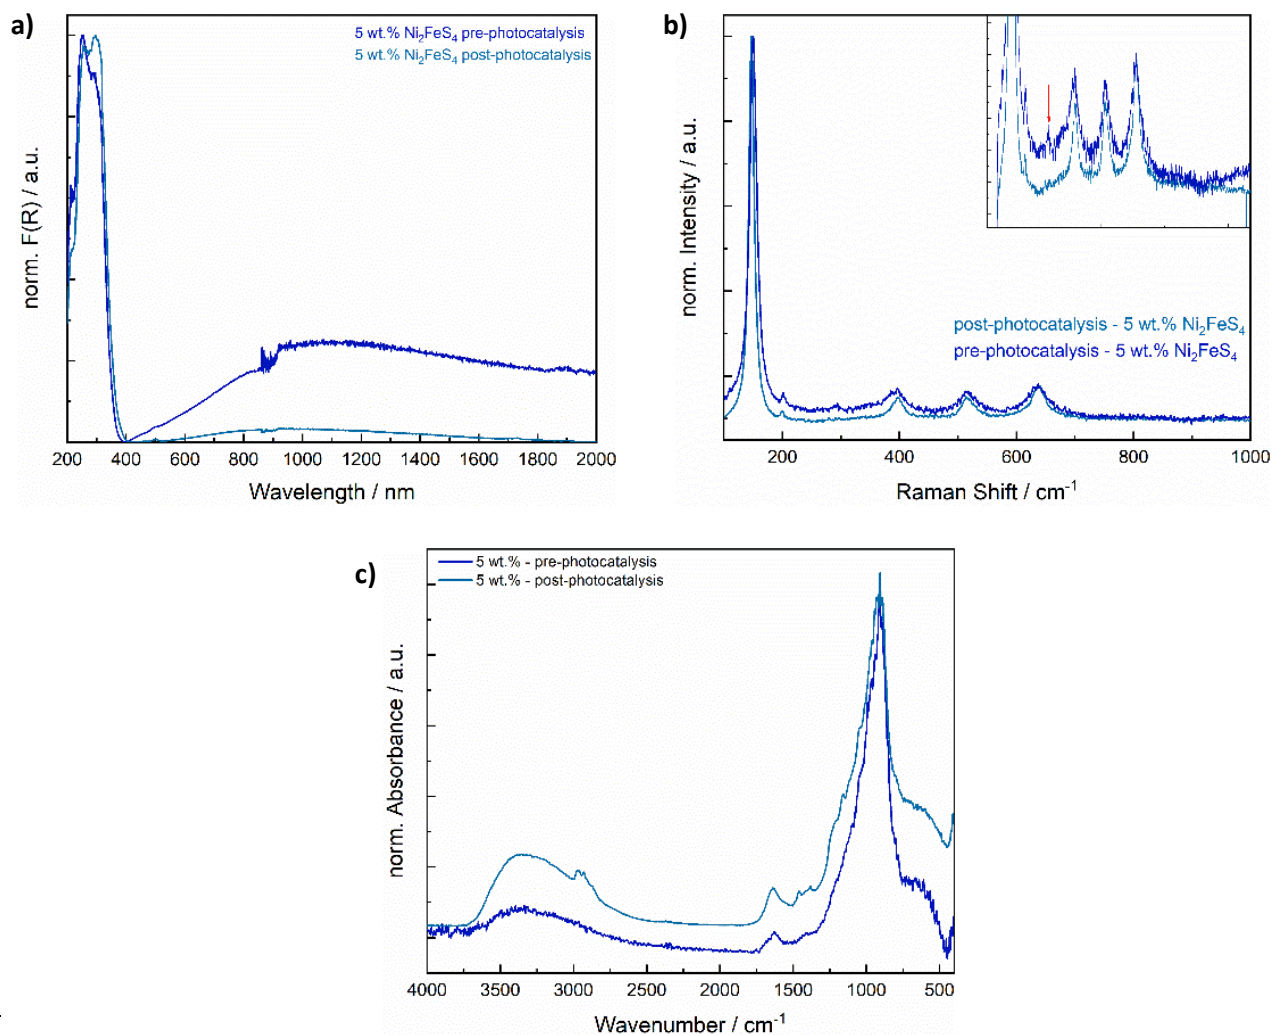

**Figure S17** Comparison of TiO<sub>2</sub> loaded with 5 wt.% of Ni<sub>2</sub>FeS<sub>4</sub> before and after photocatalysis: UV/vis/NIR spectra (a), Raman spectra (b) and DRIFT spectra (c).

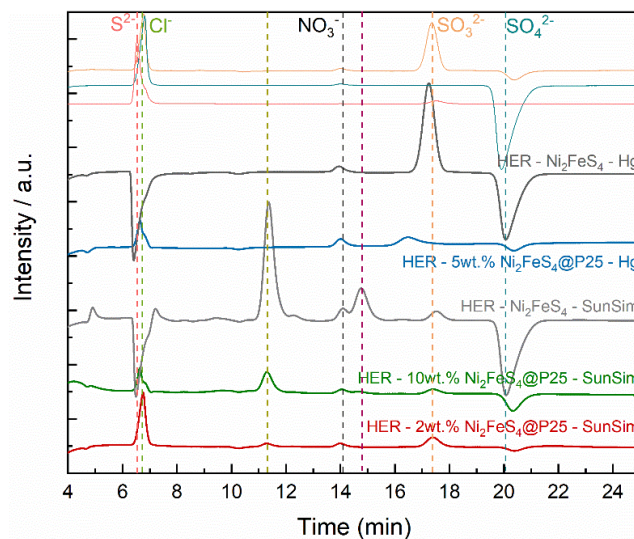

**Figure S18** Ion-Chromatography for selected samples after the photocatalysis, showing the evolution of SO<sub>3</sub><sup>2-</sup> and SO<sub>4</sub><sup>2-</sup>.

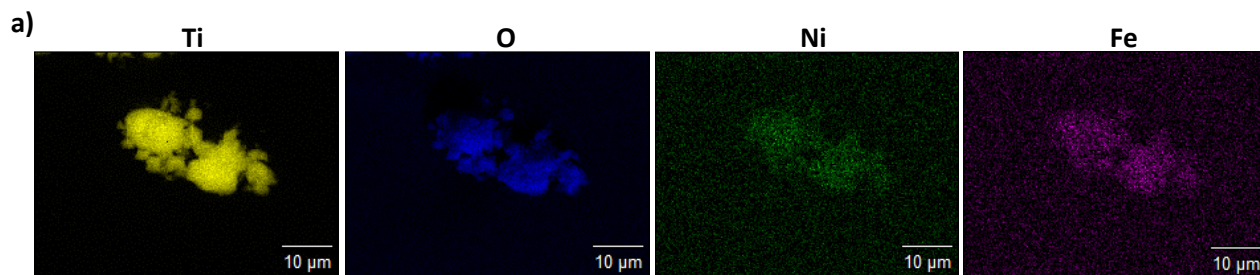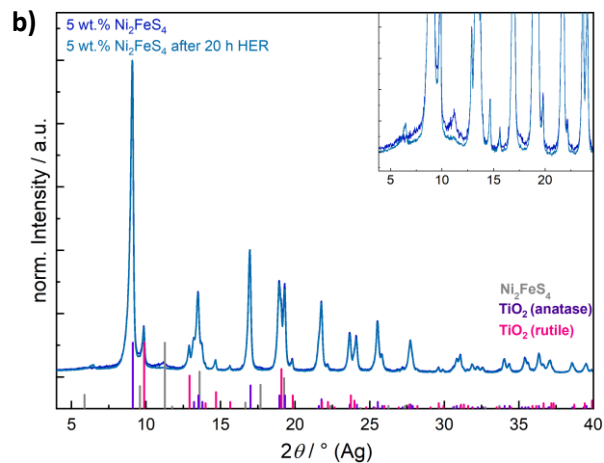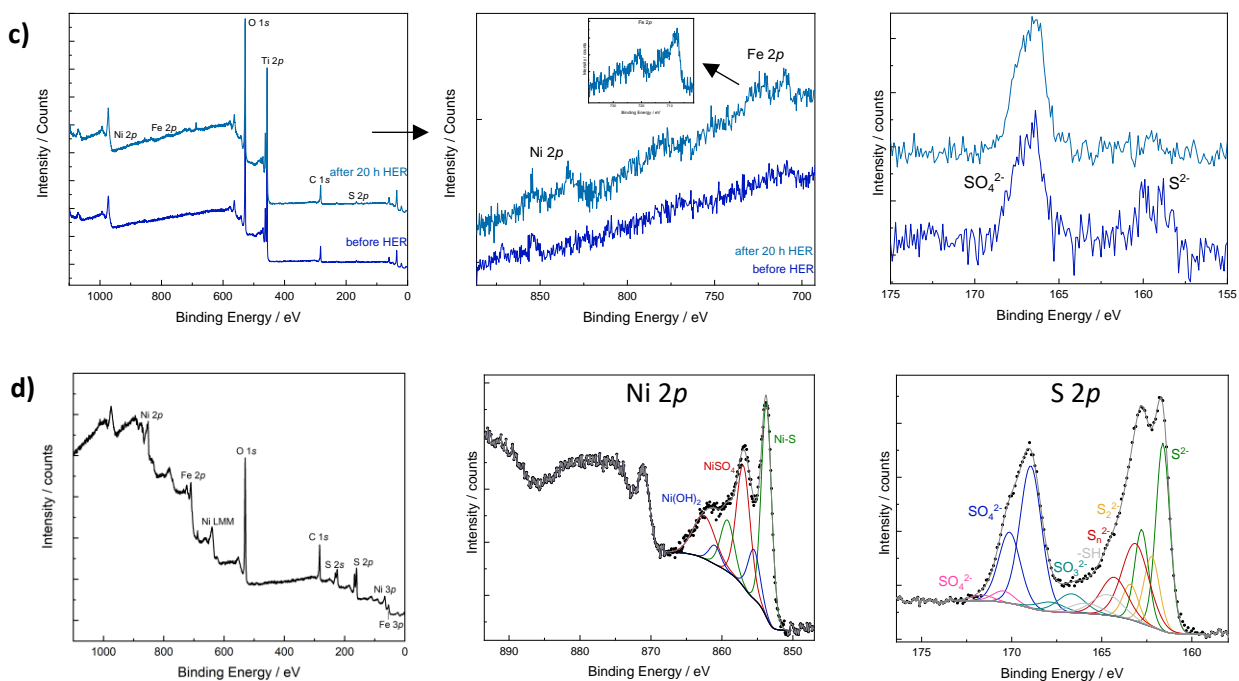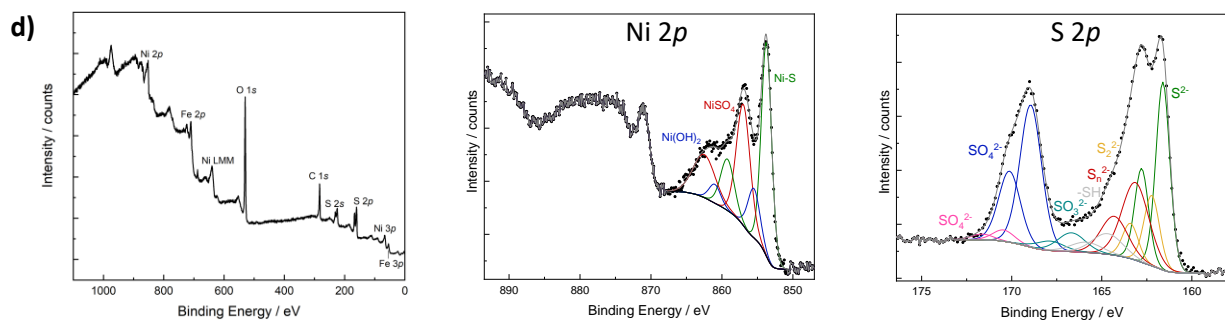

**Figure S19** EDX mapping of 5 wt.%  $\text{Ni}_2\text{FeS}_4$ @P25 after irradiation for 20 h (a), Ag-XRD pattern for the same sample (b) and XPS results for 5 wt.%  $\text{Ni}_2\text{FeS}_4$ @P25 before and after the 20 h experiment (c), as well as for  $\text{Ni}_2\text{FeS}_4$  stirred for 48 h in water.

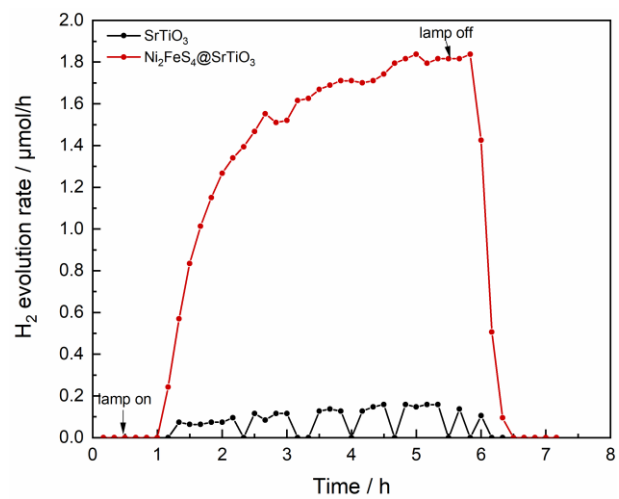

**Figure S20** Hydrogen evolution over 5 wt.% of  $\text{Ni}_2\text{FeS}_4$  on Al-doped  $\text{SrTiO}_3$  under 1 sun simulated sunlight.
